# Supplementary material for: Preparation of glucose responsive polyelectrolyte capsules with shell crosslinking via the layer-by-layer technique and sustained release of insulin
Source: Royal Society of Chemistry journal article supplement (doi:10.1039/c6py01448h), 2016-01-01
Supplement: c6py01448h1.pdf [file c6py01448h1.pdf]

# **Preparation of Glucose Responsive Polyelectrolyte Capsules with Shell Crosslinking via Layer-by-Layer Technique and Sustained Release of Insulin**

*Dongjian Shi<sup>a\*</sup>, Maoshuang Ran<sup>a</sup>, He Huang<sup>a</sup>, Li Zhang<sup>a</sup>, Xiaojie Li<sup>a</sup>, Mingqing Chen<sup>a</sup>,*

*Mitsuru Akashi<sup>b</sup>*

<sup>a</sup> The Key Laboratory of Food Colloids and Biotechnology Ministry of Education, School of Chemical and Material Engineering, Jiangnan University, Wuxi 214122, P. R. China

<sup>b</sup> Department of Applied Chemistry, Graduate School of Engineering, Osaka University, 2-1 Yamadaoka, Suita 565-0871, Japan

Author to whom correspondence should be addressed;

E-Mail: mqchen@jiangnan.edu.cn, djshi@jiangnan.edu.cn

Tel.: +86-510-85917019; Fax: +81-510-85917763.

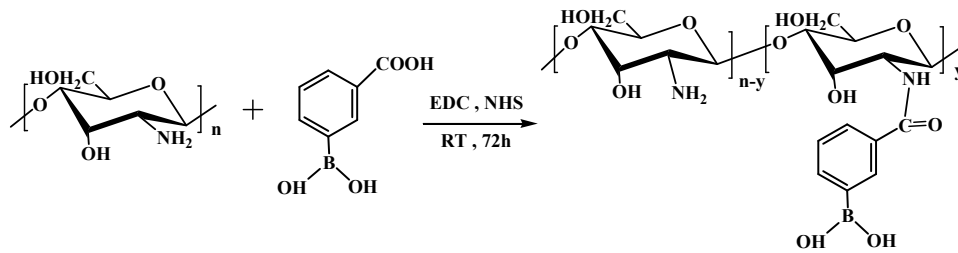

**Scheme S1** Schematic representation for Synthesis of CS-g-CPBA polymer

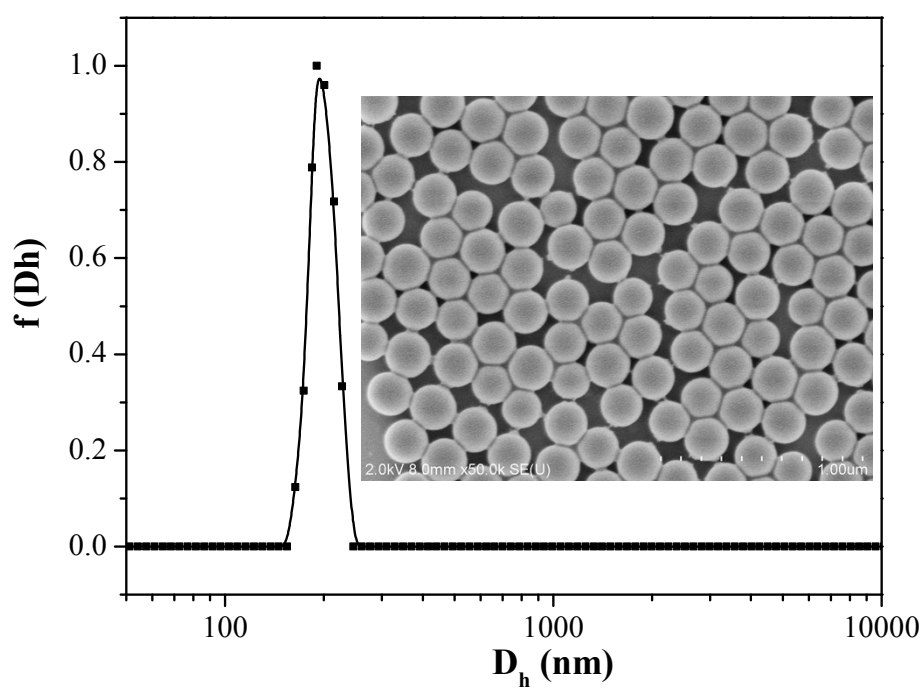

**Fig. S1** DLS results and SEM images of SiO<sub>2</sub> nanoparticles

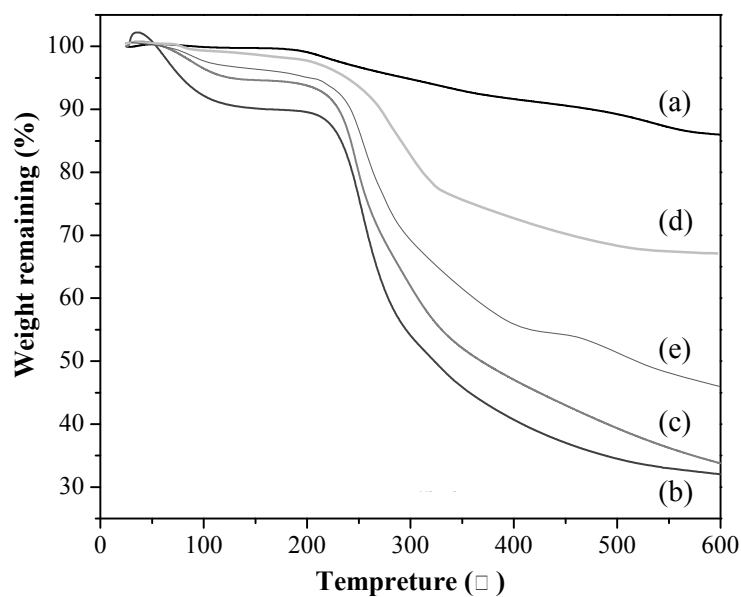

**Fig. S2** TGA curves of SiO<sub>2</sub>-NH<sub>2</sub> microspheres (a), CS-g-CPBA<sub>0.31</sub> (b) and Alg (c) polymers, (Alg/CS-g-CPBA<sub>0.31</sub>)<sub>5</sub>@SiO<sub>2</sub> nanoparticles (d) and (Alg/CS-g-CPBA<sub>0.31</sub>)<sub>5</sub> capsules after crosslinking (e).

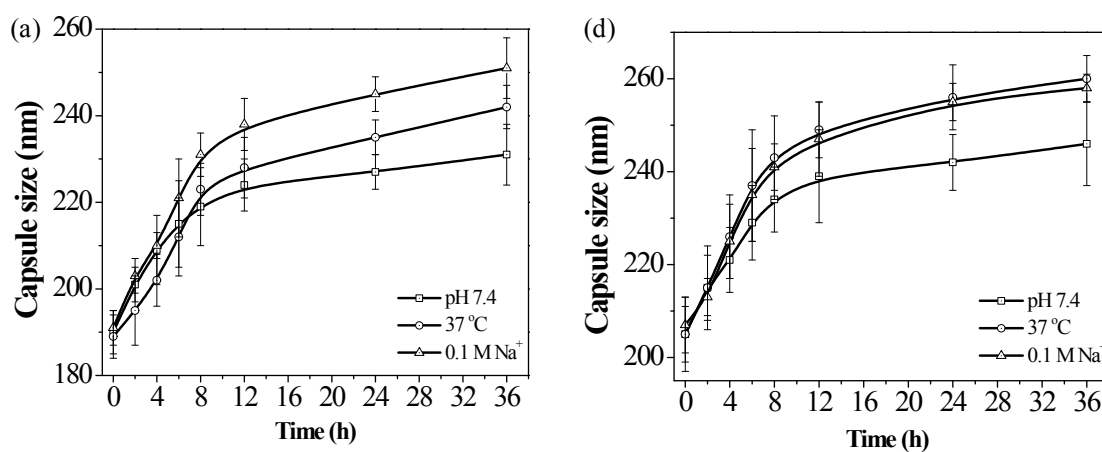

**Fig. S3** Size change of (Alg/CS-g-CPBA<sub>0.31</sub>)<sub>9</sub> capsules without (a) and with 0.5 % Ca<sup>2+</sup> (b) at the temperature of 37 °C, salt concentration of 0.1M and pH value of 7.4

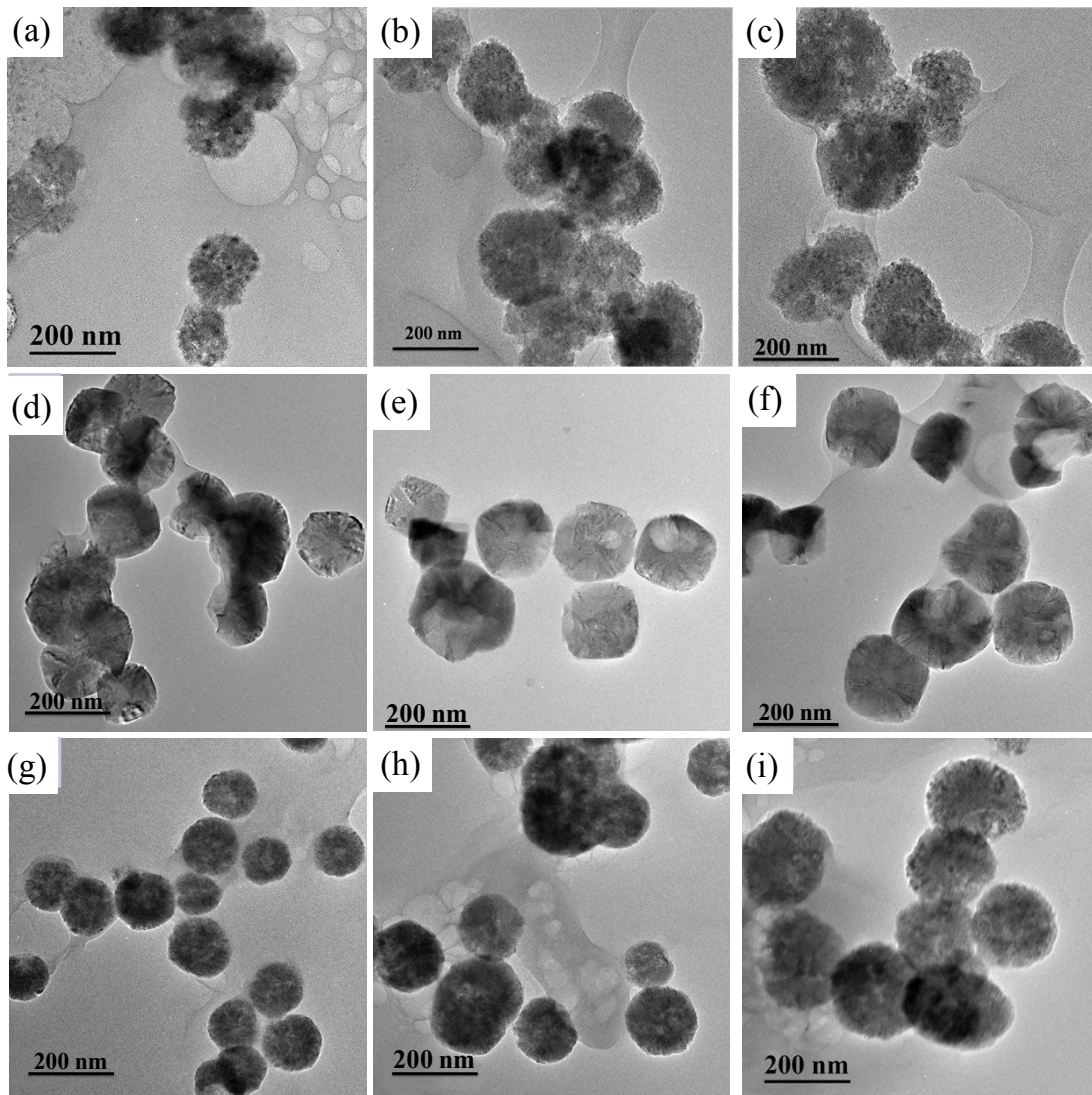

**Fig. S4** Morphology changes of (Alg/CS-g-CPBA<sub>0.31</sub>)<sub>9</sub> capsules without Ca<sup>2+</sup> (a-c), with 0.5 (d-f) and 1.0 % Ca<sup>2+</sup> (g-i) after treatment of 20 mg/mL of glucose for 4 h (a, d, g), 8 h (b, e, h) and 12 h (c, f, i).

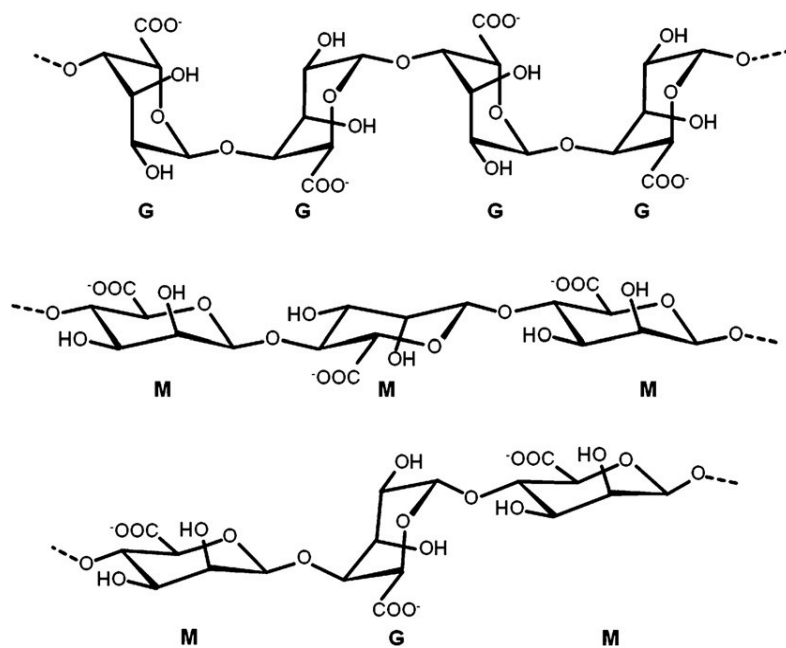

**Fig. S5** Chemical structures of GG, MM, and GM block in alginate

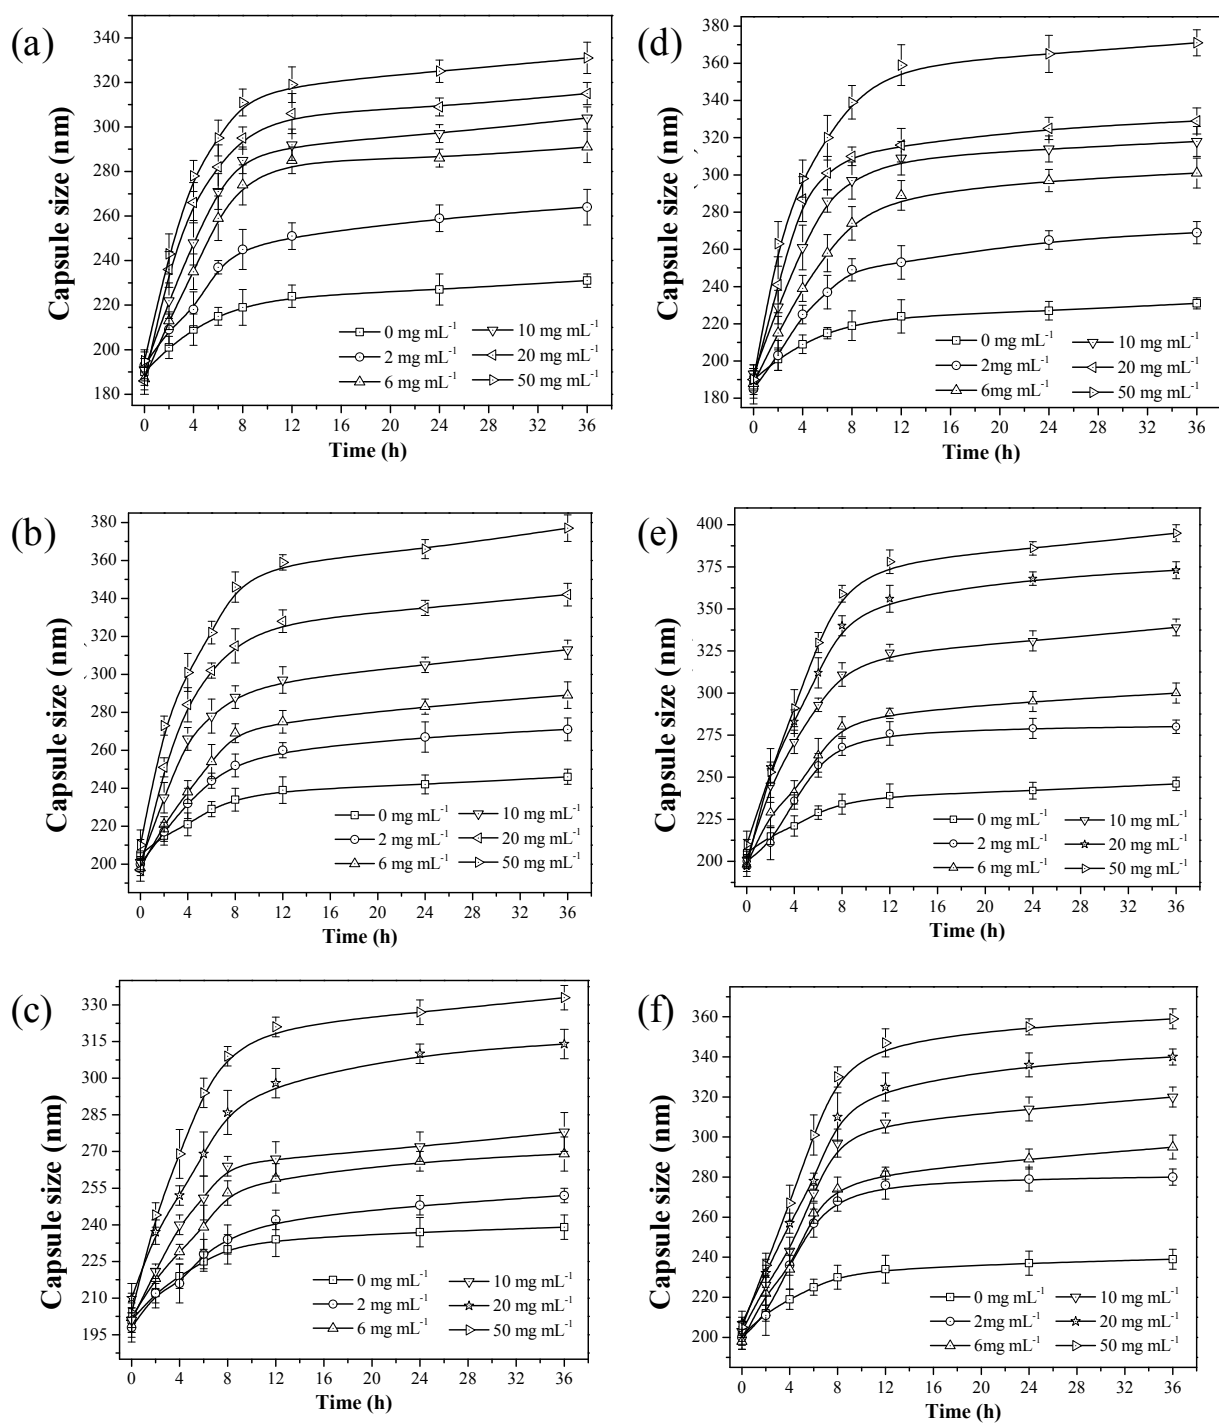

**Fig. S6** Effects of glucose concentration on diameters of (Alg/CS-g-CPBA<sub>0.09</sub>)<sub>9</sub> (a-c), (Alg/CS-g-CPBA<sub>0.16</sub>)<sub>9</sub> (d-f) capsules without Ca<sup>2+</sup> (a and d) and with 0.5% (b and e) and 1% (c and f) of Ca<sup>2+</sup>

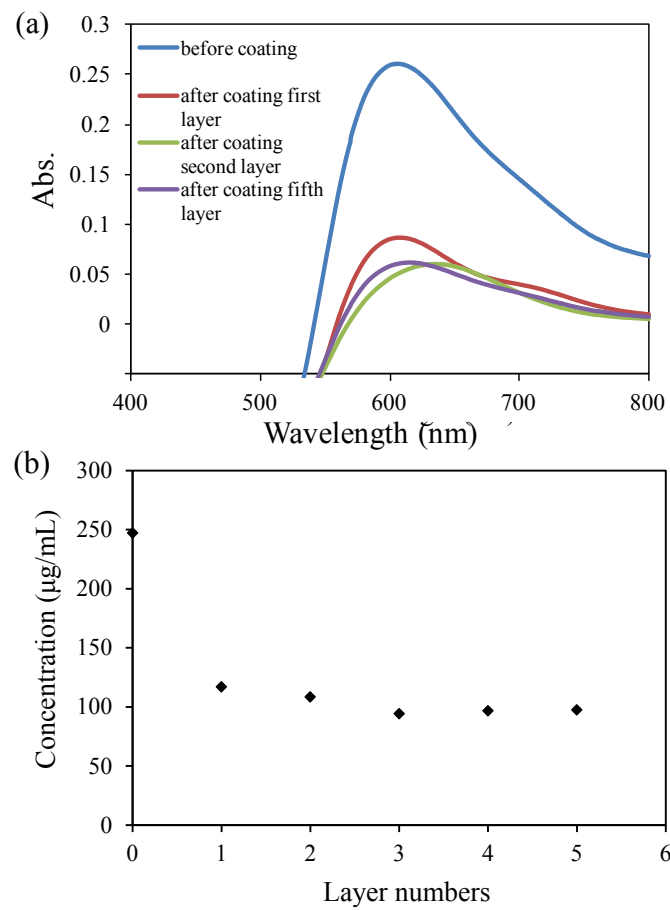

**Fig. S7** (a) UV-vis spectra of the (Alg/CS-g-CPBA<sub>0.31</sub>)<sub>n</sub>@SiO<sub>2</sub> nanoparticles with different layer numbers. (b) the changes of the insulin concentration with different layer numbers

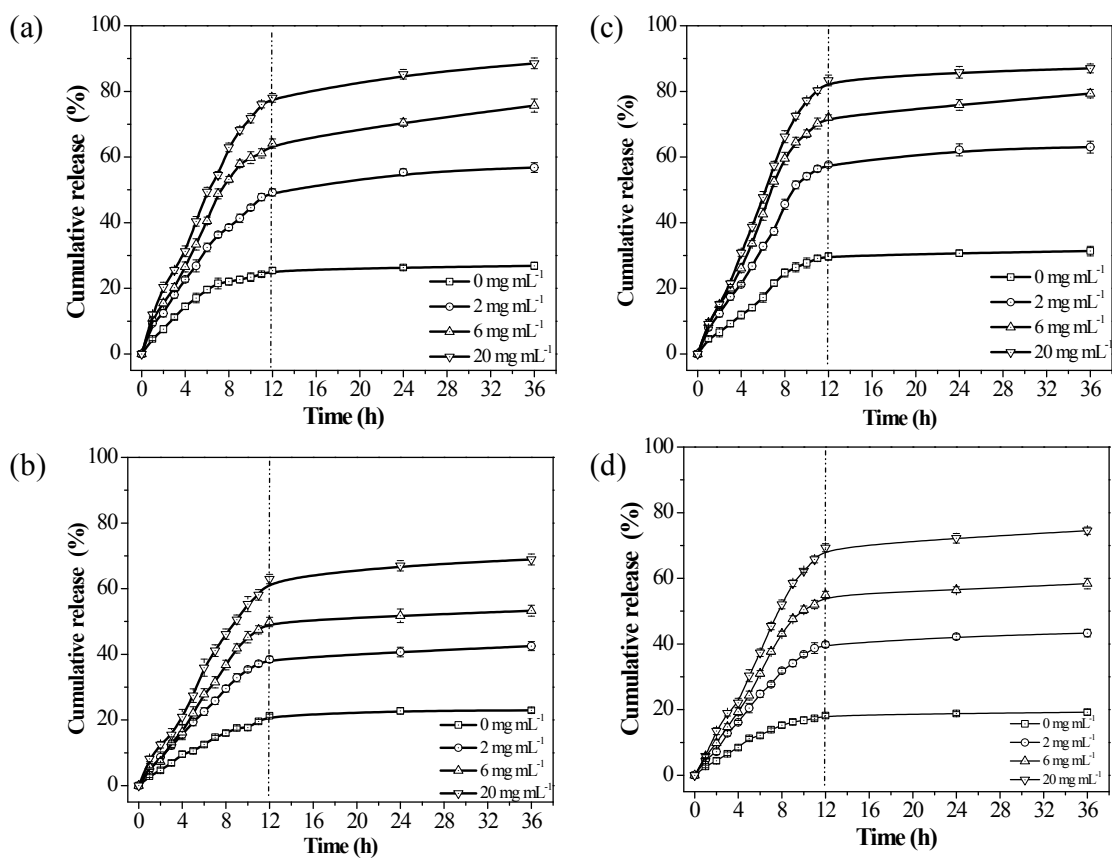

**Fig. S8** Glucose-responsive release of insulin by (Alg/CS-g-CPBA<sub>0.09</sub>)<sub>9</sub> (a-b) and (Alg/CS-g-CPBA<sub>0.16</sub>)<sub>9</sub> (c-d) capsules without (a and c) and with (b and d) 0.5 % Ca<sup>2+</sup>

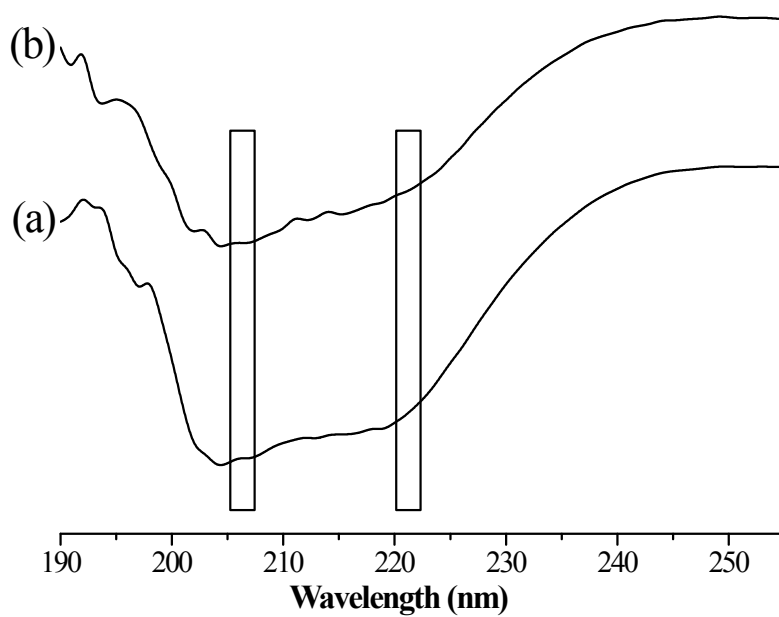

**Fig. S9** CD spectra of native insulin (a) and insulin released from complexes (b)
